# Supplementary material
Source: PubMed Central journal article supplement (PMC7836694)
Supplement: mmc1.pdf [file mmc1.pdf]

# THE LANCET

## Supplementary appendix

This appendix formed part of the original submission. We post it as supplied by the authors.

Supplement to: Lee N, Ison M, Dunning J. Early triple antiviral therapy for COVID-19. *Lancet* 2020; **396**: 1487–88.

## Appendix

**Table. Evidence and concerns on interferons, lopinavir-ritonavir and ribavirin for the treatment of coronavirus infections**

|                                   |           |                                                                                                                                                                                                                                                                                                                                                                                                                                                                                                             |
|-----------------------------------|-----------|-------------------------------------------------------------------------------------------------------------------------------------------------------------------------------------------------------------------------------------------------------------------------------------------------------------------------------------------------------------------------------------------------------------------------------------------------------------------------------------------------------------|
| <b><i>Interferons</i></b>         | SARS-CoV1 | non-randomized study: add-on interferon- $\alpha$ (n=9, median 8 days post-onset) vs corticosteroid-ribavirin alone, associated with improvements in pneumonia and oxygenation. <sup>(a,b)</sup> Practical challenge to administer in non-hospitalized patients.                                                                                                                                                                                                                                            |
|                                   | MERS-CoV  | non-randomized study: interferon- $\alpha$ /b plus ribavirin (n=144, median 9 days post-onset) vs SOC, insignificant difference in clinical/virological outcomes. <sup>(c)</sup> Systemic review (8 clinical studies): no outcome benefit. <sup>(d)</sup>                                                                                                                                                                                                                                                   |
| <b><i>Lopinavir-ritonavir</i></b> | SARS-CoV1 | non-randomized study: add-on lopinavir/ritonavir (n=75) vs corticosteroid-ribavirin alone, associated with reduced death/ARDS if given early (median 5.5 days from onset). <sup>(e,f)</sup>                                                                                                                                                                                                                                                                                                                 |
|                                   | SARS-CoV2 | randomized-controlled trial (n=199): lopinavir/ritonavir vs SOC, insignificant difference in clinical/virological outcomes. Trend towards clinical improvement if given <12 days from onset. Significant GI side-effects, with 14% discontinuation. <sup>(g)</sup> randomized-controlled trial: lopinavir/ritonavir (n=1616) vs SOC (n=3424) in hospitalized patients showed no clinical benefit. <sup>(h)</sup> Required therapeutic concentration likely unachievable with current dosing. <sup>(i)</sup> |
| <b><i>Ribavirin</i></b>           | SARS-CoV1 | systematic review (30 clinical studies): inconclusive benefit and possible harm (e.g. hemolytic anaemia). Required therapeutic concentration unachievable with current dosing. <sup>(b)</sup>                                                                                                                                                                                                                                                                                                               |
|                                   | MERS-CoV  | systematic review (7 clinical studies): no outcome benefit and possible harm (e.g. hemolytic anaemia). Required therapeutic concentration unachievable with current dosing. <sup>(c,d)</sup>                                                                                                                                                                                                                                                                                                                |

SOC: standard of care (may include corticosteroids); interferons / lopinavir-ritonavir (but not ribavirin) are candidates in the WHO 'Solidarity Trial': <https://www.who.int/emergencies/diseases/novel-coronavirus-2019/global-research-on-novel-coronavirus-2019-ncov/solidarity-clinical-trial-for-covid-19-treatments> ; and the UK 'Recovery Trial': <http://www.isrctn.com/ISRCTN50189673>

### **References:**

**(a)** Loutfy MR, et al. *JAMA*. 2003;290(24):3222-8.

**(b)** Stockman LJ, et al. *PLoS Med*. 2006;3(9):e343.

- (c) Arabi YM, et al. *Clin Infect Dis*. 2020;70(9):1837-1844.
- (d) Kain T, et al. *Emerg Infect Dis*. 2020 Mar 26;26(6).
- (e) Chu CM, et al. *Thorax*. 2004;59(3):252-6.
- (f) Chan et al. *Hong Kong Med J* 2003;9(6):399-406.
- (g) Cao B, et al. *N Engl J Med*.;382(19):1787-1799.
- (h) RECOVERY Collaborative Group. *Lancet*. 2020:S0140-6736(20)32013-4.
- (i) Schoergenhofer C, et al. *Ann Intern Med* 2020;M20-1550.
